# Supplementary material
Source: publisher figshare collection journal article supplement (https://karger.figshare.com/ndownloader/files/30832222)
Supplement: Supplementary file 1 [file 30832222]

Supplementary Table 4. Summary of post-operative complications (retrospectives studies).

|  | **CLAVIEN DINDO I** | | | | **CLAVIEN DINDO II** | | **CLAVIEN DINDO III** | | | |  |
| --- | --- | --- | --- | --- | --- | --- | --- | --- | --- | --- | --- |
| **Author** | **Dysuria, n (%)** | **Stress incontinence, n (%)** | **Transient urinary incontinence, n (%)** | **Permanent urinary incontinence, n (%)** | **Renal Insufficiency, n (%)** | **Urge incontinence, n (%)** | **Reoperation for persistent prostatic tissue in bladder, n (%)** | **Hydronefrosis, n (%)** | **urethral stricture, n (%)** | **bladder neck contracture (III)** | **N. of Procedures** |
| Hettiarachchi58 | Nd | nd | Nd | Nd | Nd | Nd | Nd | Nd | 1 (5.6) | 1 (5.6) | 18 |
| Hurle59 | 39 (25.8) | 13 (8.6) | 13 (8.6) | 1 (0.7) | Nd | Nd | 3 (2) | Nd | 5 (3.3) | 1 (0.7) | 151 |
| Kuo57 | Nd | Nd | Nd | Nd | Nd | Nd | Nd | Nd | 5 (2.4) | 8 (3.9) | 206 |
| Peterson52 | Nd | Nd | 21 (12.8) | 1 (0.6) | Nd | Nd | Nd | Nd | 2 (1.2) | Nd | 164 |
| ﻿Elzayat51 | 21 (9.3) | 16 (7.1) | 8 (3.6) | 4 (1.8) | Nd | 4 (1.8) | Nd | Nd | 4 (1.8) | 1 (0.4) | 225 |
| Matlaga49 | Nd | Nd | Nd | Nd | Nd | Nd | Nd | Nd | Nd | Nd | 86 |
| Seki47 | Nd | 2 (2.1) | 6 (6.2) | 2 (2.1) | Nd | 6 (6.2) | Nd | Nd | 3 (3.1) | 1 (1) | 97 |
| Du46 | Nd | Nd | 10 (5.3) | 2 (1.1) | Nd | Nd | Nd | Nd | Nd | Nd | 190 |
| Shah45 | Nd | Nd | 8 (2.3) | 2 (0.6) | Nd | Nd | Nd | Nd | 15 (4.2) | 1 (0.3) | 354 |
| Bae42 | Nd | Nd | Nd | Nd | Nd | Nd | Nd | Nd | Nd | Nd | 161 |
| Warner39 | Nd | Nd | Nd | Nd | Nd | Nd | Nd | Nd | Nd | Nd | 176 |
| Mmeje 37 | Nd | Nd | Nd | 27 (8.7) | Nd | Nd | 3 (1) | Nd | 8 (2.6) | 9 (2.9) | 311 |
| Shigemura35 | Nd | Nd | Nd | Nd | Nd | Nd | Nd | Nd | Nd | Nd | 90 |
| Choi34 | 5 (1.2) | Nd | 22 (5.5) | 1 (0.2) | 3 (0.7) | 5 (1.2) | 3 (0.7) | Nd | Nd | Nd | 402 |
| Lee31 | 3 (6.7) | 4 (8.9) | Nd | Nd | Nd | Nd | Nd | Nd | Nd | Nd | 45 |
| Brunckhorst29 | Nd | Nd | Nd | 9 (3.6) | Nd | Nd | Nd | Nd | 5 (2) | 0 | 253 |
| Hong26 | 0 | 2 (4.3) | 7 (15.2) | 0 | Nd | 5 (10.9) | 0 | Nd | 0 | 1 (2.2) | 46 |
| Jaeger25 | Nd | Nd | 2 (2.8) | Nd | Nd | Nd | Nd | Nd | 2 (2.8) | 1 (1.4) | 72 |
| Kim24 | Nd | Nd | 30 (6) | 0 | Nd | 2 (0.4) | 0 | Nd | 1 (0.2) | 1 (0.2) | 502 |
| Placer23 | Nd | Nd | Nd | Nd | Nd | Nd | Nd | Nd | Nd | Nd | 202 |
| Alkan22 | 3 (3.1) | 1 (1) | Nd | 0 | Nd | 0 | 2 (2.1) | Nd | 3 (3.1) | 0 | 96 |
| Kikuchi18 | Nd | Nd | Nd | Nd | Nd | Nd | Nd | Nd | 5 (2.6) | Nd | 190 |
| McAdams16 | Nd | Nd | Nd | Nd | Nd | Nd | Nd | Nd | Nd | Nd | 82 |
| Minagawa15 | Nd | 0 | 10 (13.5) | 0 | Nd | 0 | Nd | Nd | 6 (8.1) | Nd | 74 |
| Park13 | 0 | Nd | Nd | 0 | Nd | Nd | 0 | Nd | 0 | 3 (2.3) | 132 |
| Pathak12 | Nd | Nd | Nd | Nd | Nd | Nd | Nd | Nd | Nd | Nd | 60 |
| Ajib65 | 7 (25.9) | 0 | 0 | 0 | Nd | 0 | 0 | Nd | 0 | Nd | 27 |
| Enikeev63 | Nd | Nd | Nd | Nd | Nd | Nd | Nd | Nd | Nd | Nd | 254 |
| Gu54 | Nd | Nd | 2 (3.6) | 0 | Nd | Nd | Nd | Nd | Nd | Nd | 56 |
| Lee32 | 1 (0.5) | Nd | Nd | Nd | Nd | Nd | Nd | Nd | Nd | Nd | 210 |
| Sun9 | Nd | 81 (7.2) | 81 (7.2) | Nd | Nd | Nd | Nd | Nd | 19 (1.7) | 11 (1) | 1124 |
| Cho10 | Nd | Nd | Nd | Nd | Nd | Nd | Nd | Nd | 2 (2) | 1 (1) | 102 |
| Morozov61 | Nd | 8 (1.7) | Nd | Nd | Nd | Nd | Nd | Nd | 9 (1.8) | 5 (1) | 509 |
| **Total included** | **1156** | **2293** | **3457** | **2147** | **402** | **1272** | **960** | **0** | **4448** | **3849** |  |
| **patients** |  |  |  |  |  |  |  |  |  |  |  |
| **Overall complication** | **79 (6,8)** | **127 (5,5)** | **220 (6,4)** | **49 (2,3)** | **3 (0.7)** | **22 (1,7)** | **8 (0,8)** | **0** | **95 (2,1)** | **45 (1,2)** |  |
